# Supplementary material for: Electrophysiological ventricular substrate of stroke: a prospective cohort study in the Atherosclerosis Risk in Communities (ARIC) study
Source: PubMed Central journal article supplement — BMJ Open. 2021 Sep 3;11(9):e048542. doi: 10.1136/bmjopen-2020-048542 (PMC8420653; doi:10.1136/bmjopen-2020-048542), 2021-09-03

## Supplemental Material

Supplemental Table 1. Comparison of baseline clinical and ECG characteristics in participants with abnormal GEH metrics

| Characteristics                                          | Normal GEH<br>(n=2,837; 19.5%) | 1 abnormal GEH<br>(n=5,290; 36.6%) | 2 abnormal GEH<br>(n=4,090; 28%) | 3 abnormal GEH<br>(n=1,382; 10%) | 4 abnormal GEH<br>(n=555; 4%) | 5 abnormal GEH<br>(n=325; 2%) | ANOVA<br>or $\chi^2$ P |
|----------------------------------------------------------|--------------------------------|------------------------------------|----------------------------------|----------------------------------|-------------------------------|-------------------------------|------------------------|
| Age(SD), y                                               | 53.4(5.7)                      | 54.0(5.7)                          | 54.3(5.8)                        | 54.8(5.8)                        | 55.1(5.8)                     | 56.8(5.6)                     | <0.0001                |
| Female, n(%)                                             | 2,777(97.9)                    | 2,872(54.3)                        | 1,598(39.1)                      | 527(38.1)                        | 113(20.4)                     | 117(36.0)                     | <0.0001                |
| White, n(%)                                              | 2,189(77.2)                    | 4,075(77.0)                        | 3,159(77.2)                      | 979(70.8)                        | 340(61.3)                     | 193(59.4)                     | <0.0001                |
| Prevalent cardiovascular disease, n(%)                   | 291(10.3)                      | 572(10.8)                          | 503(12.3)                        | 235(17.0)                        | 126(22.7)                     | 107(32.9)                     | <0.0001                |
| Body mass index(SD), kg/m <sup>2</sup>                   | 27.7(5.6)                      | 27.8(5.3)                          | 27.4(5.0)                        | 27.3(5.2)                        | 26.9(4.6)                     | 27.7(4.9)                     | 0.0001                 |
| Waist-to-hip ratio (SD)                                  | 0.896(0.081)                   | 0.929(0.077)                       | 0.934(0.075)                     | 0.934(0.077)                     | 0.943(0.069)                  | 0.940(0.070)                  | <0.0001                |
| Hypertension, n(%)                                       | 739(26.1)                      | 1,709(32.3)                        | 1,391(34.0)                      | 569(41.2)                        | 281(50.6)                     | 176(54.2)                     | <0.0001                |
| Antihypertensive drugs, n(%)                             | 750(26.4)                      | 1,525(28.8)                        | 1,153(28.2)                      | 484(35.0)                        | 230(41.4)                     | 145(44.6)                     | <0.0001                |
| Systolic blood pressure(SD), mmHg                        | 116.4(16.5)                    | 120.2(17.6)                        | 121.8(18.3)                      | 124.9(20.0)                      | 129.8(24.7)                   | 129.8(23.4)                   | <0.0001                |
| Diastolic blood pressure(SD), mmHg                       | 70.8(9.9)                      | 73.4(10.6)                         | 74.0(10.8)                       | 74.9(12.4)                       | 78.0(14.6)                    | 77.8(14.7)                    | <0.0001                |
| eGFR <sub>CKD-EPI</sub> (SD), mL/min/1.73 m <sup>2</sup> | 96.9(14.3)                     | 95.7(15.1)                         | 95.3(14.9)                       | 94.4(16.3)                       | 94.4(17.3)                    | 90.2(18.8)                    | <0.0001                |
| Diabetes, n(%)                                           | 247(8.7)                       | 556(10.5)                          | 477(11.7)                        | 195(14.1)                        | 98(17.7)                      | 64(19.7)                      | <0.0001                |
| Current tobacco smoker, n(%)                             | 647(22.8)                      | 1,315(24.9)                        | 1,071(26.2)                      | 426(30.8)                        | 186(33.5)                     | 85(26.2)                      | <0.0001                |
| Current alcohol drinker, n(%)                            | 1,519(53.5)                    | 3,044(57.5)                        | 2,390(58.4)                      | 780(56.4)                        | 313(56.4)                     | 170(52.3)                     | 0.001                  |
| Leisure physical activity score(SD)                      | 2.42(0.58)                     | 2.37(0.57)                         | 2.37(0.56)                       | 2.33(0.58)                       | 2.27(0.57)                    | 2.27(0.56)                    | <0.0001                |
| Total cholesterol(SD), mmol/L                            | 5.66(1.09)                     | 5.54(1.08)                         | 5.50(1.06)                       | 5.51(1.05)                       | 5.55(1.11)                    | 5.53(1.07)                    | <0.0001                |
| HDL cholesterol(SD), mg/dL                               | 57.2(16.7)                     | 51.3(17.2)                         | 49.8(16.7)                       | 49.7(17.0)                       | 48.3(17.1)                    | 23.2(25.7)                    | <0.0001                |
| Triglycerides(SD), mmol/L                                | 1.39(0.97)                     | 1.50(1.00)                         | 1.50(1.03)                       | 1.53(1.07)                       | 1.53(1.00)                    | 1.55(1.01)                    | <0.0001                |
| Lipid-lowering drugs, n(%)                               | 78(2.8)                        | 148(2.8)                           | 123(3.0)                         | 46(3.3)                          | 17(3.1)                       | 15(4.6)                       | 0.448                  |
| Plaque in any carotid site, n(%)                         | 688(24.3)                      | 1,701(32.2)                        | 1,435(35.1)                      | 533(38.6)                        | 243(43.8)                     | 152(46.8)                     | <0.0001                |
| Aspirin, n(%)                                            | 1,389(49.0)                    | 2,466(46.6)                        | 1,905(46.6)                      | 637(46.1)                        | 234(42.2)                     | 147(45.2)                     | 0.054                  |
| Anticoagulants, n(%)                                     | 2(0.07)                        | 12(0.23)                           | 16(0.39)                         | 11(0.80)                         | 7(1.26)                       | 9(2.77)                       | <0.0001                |
| Antiarrhythmic drugs, n(%)                               | 293(10.3)                      | 668(12.6)                          | 566(13.8)                        | 253(18.3)                        | 132(23.8)                     | 79(24.3)                      | <0.0001                |
| Heart rate(SD), bpm                                      | 67.7(9.6)                      | 66.1(9.9)                          | 65.2(10.3)                       | 66.3(11.4)                       | 65.5(10.6)                    | 67.3(11.0)                    | <0.0001                |

|                                       |             |             |             |             |             |             |         |
|---------------------------------------|-------------|-------------|-------------|-------------|-------------|-------------|---------|
| QRS duration(SD), ms                  | 85.7(7.8)   | 90.4(9.5)   | 93.8(10.5)  | 98.7(14.9)  | 107.7(20.2) | 106.5(25.5) | <0.0001 |
| Bazett-corrected QTc(SD), ms          | 417.8(18.3) | 414.7(18.1) | 414.3(17.8) | 418.2(20.2) | 423.1(24.3) | 428.3(31.7) | <0.0001 |
| ECG-LVH, n(%)                         | 16(0.6)     | 109(2.1)    | 170(4.2)    | 197(14.3)   | 195(35.1)   | 119(36.6)   | <0.0001 |
| BBB/IVCD, n(%)                        | 30(1.1)     | 111(2.1)    | 146(3.6)    | 138(10.0)   | 123(22.2)   | 60(18.5)    | <0.0001 |
| Any visit TD-IBBB, n(%)               | 16(0.56)    | 54(1.02)    | 37(0.90)    | 9(0.65)     | 2(0.36)     | 4(1.23)     | 0.181   |
| Any visit PVC, n(%)                   | 152(5.4)    | 402(7.6)    | 388(9.5)    | 166(12.0)   | 61(11.0)    | 33(10.2)    | <0.0001 |
| Any visit PAC, n(%)                   | 202(7.1)    | 460(8.7)    | 361(8.8)    | 129(9.3)    | 44(7.9)     | 29(8.9)     | 0.097   |
| Any visit Atrial Fibrillation, n(%)   | 472(16.6)   | 1,136(21.5) | 897(21.9)   | 357(25.8)   | 128(23.1)   | 47(14.5)    | <0.0001 |
| Abnormal PR interval, n(%)            | 219(7.7)    | 447(8.5)    | 367(9.0)    | 142(10.3)   | 80(14.4)    | 47(14.5)    | <0.0001 |
| Abnormal Frontal P axis, n(%)         | 188(6.6)    | 399(7.5)    | 345(8.4)    | 152(11.0)   | 67(12.1)    | 37(11.4)    | <0.0001 |
| Abnormal PTF in V1, n(%)              | 171(6.0)    | 439(8.3)    | 440(10.8)   | 217(15.7)   | 119(21.4)   | 60(18.5)    | <0.0001 |
| Median beat S or V at any visit, n(%) | 44(1.6)     | 140(2.7)    | 134(3.3)    | 63(4.6)     | 24(4.3)     | 16(4.9)     | <0.0001 |

HDL=High-density lipoprotein; SD=standard deviation; LVH=left ventricular hypertrophy; BBB=bundle branch block; IVCD=interventricular conduction delay; PVC=premature ventricular complex; PAC=premature atrial complex; PTF=P-terminal force; eGFR= Estimated glomerular filtration rate.

**Supplemental Table 2. Association of GEH with incident stroke in Cox models with pure stroke type outcomes.**

| Predictor, per 1 SD       | Model 1                 |                         | Model 2                 |                         | Model 3                |                         | Model 4                |                         | Model 5         |                         |                   |
|---------------------------|-------------------------|-------------------------|-------------------------|-------------------------|------------------------|-------------------------|------------------------|-------------------------|-----------------|-------------------------|-------------------|
|                           | HR(95%CI)               | P-value                 | HR(95%CI)               | P-value                 | HR(95%CI)              | P-value                 | HR(95%CI)              | P-value                 | HR(95%CI)       | P-value                 |                   |
| Embolitic stroke (n=335)  | Peak QRS-T angle        | <b>1.27(1.15-1.39)#</b> | <b>&lt;0.0001</b>       | <b>1.19(1.08-1.31)</b>  | <b>0.001</b>           | <b>1.12(1.01-1.24)</b>  | <b>0.027</b>           | 1.11(0.99-1.23)         | 0.067           | 1.10(0.99-1.22)#        | 0.074             |
|                           | Area QRS-T angle        | <b>1.29(1.16-1.43)#</b> | <b>&lt;0.0001</b>       | <b>1.23(1.11-1.37)#</b> | <b>&lt;0.0001</b>      | <b>1.15(1.03-1.28)#</b> | <b>0.014</b>           | <b>1.13(1.01-1.27)#</b> | <b>0.040</b>    | <b>1.12(1.01-1.25)#</b> | <b>0.036</b>      |
|                           | Peak SVG elevation      | <b>1.13(1.01-1.25)#</b> | <b>0.031</b>            | 1.07(0.95-1.20)         | 0.259                  | 1.05(0.94-1.17)         | 0.404                  | 1.04(0.92-1.17)         | 0.525           | 1.00(0.89-1.12)         | 0.956             |
|                           | Area SVG elevation      | <b>1.11(1.00-1.22)</b>  | <b>0.055</b>            | 1.05(0.95-1.17)         | 0.348                  | 1.03(0.93-1.15)         | 0.545                  | 1.02(0.92-1.14)         | 0.681           | 1.00(0.90-1.12)         | 0.934             |
|                           | Peak SVG azimuth        | <b>1.12(1.02-1.24)</b>  | <b>0.019</b>            | 1.08(0.98-1.19)         | 0.137                  | 1.04(0.93-1.15)         | 0.505                  | 1.02(0.91-1.13)         | 0.758           | 0.98(0.89-1.09)#        | 0.760             |
|                           | Area SVG azimuth        | 1.04(0.93-1.16)#        | 0.472                   | 1.01(0.91-1.13)         | 0.814                  | 0.98(0.88-1.09)         | 0.693                  | 0.94(0.84-1.05)         | 0.274           | 0.99(0.90-1.09)         | 0.881             |
|                           | Peak SVG magnitude      | 1.08(0.97-1.21)         | 0.171                   | 1.08(0.96-1.21)         | 0.179                  | <b>1.13(1.01-1.27)</b>  | <b>0.038</b>           | 1.11(0.99-1.25)         | 0.068           | <b>1.17(1.05-1.31)</b>  | <b>0.006</b>      |
|                           | Area SVG magnitude      | 1.06(0.94-1.18)         | 0.335                   | 1.09(0.97-1.22)         | 0.167                  | <b>1.13(1.00-1.27)</b>  | <b>0.047</b>           | 1.11(0.99-1.25)         | 0.083           | <b>1.23(1.11-1.38)</b>  | <b>&lt;0.0001</b> |
|                           | SAIQRST                 | <b>1.20(1.09-1.31)</b>  | <b>&lt;0.0001</b>       | <b>1.21(1.10-1.33)</b>  | <b>&lt;0.0001</b>      | <b>1.20(1.09-1.32)</b>  | <b>&lt;0.0001</b>      | <b>1.23(1.09-1.39)</b>  | <b>0.001</b>    | <b>1.16(1.05-1.28)</b>  | <b>0.003</b>      |
|                           | Bazett's QTc            | <b>1.14(1.04-1.24)#</b> | <b>0.004</b>            | 1.07(0.97-1.18)         | 0.187                  | 1.00(0.90-1.12)         | 0.963                  | 0.99(0.88-1.12)         | 0.893           | 0.99(0.90-1.09)         | 0.865             |
|                           | QRS duration            | 1.07(0.96-1.19)         | 0.215                   | 1.03(0.92-1.15)         | 0.604                  | 1.02(0.91-1.14)         | 0.733                  | 0.99(0.85-1.15)         | 0.880           | 1.00(0.90-1.10)         | 0.948             |
|                           | PVC                     | <b>2.23(1.28-3.89)</b>  | <b>0.005</b>            | <b>2.25(1.29-3.94)</b>  | <b>0.004</b>           | <b>1.76(1.00-3.09)</b>  | <b>0.050</b>           | 1.73(0.98-3.06)         | 0.058           | 1.43(0.92-2.21)         | 0.110             |
|                           | TD-IBBB                 | 0.72(0.18-2.91)         | 0.648                   | 0.69(0.17-2.77)         | 0.601                  | 0.59(0.15-2.37)         | 0.456                  | 0.58(0.14-2.33)         | 0.441           | 0.92(0.13-6.63)         | 0.938             |
|                           | BBB/IVCD                | 0.96(0.57-1.62)         | 0.887                   | 0.92(0.55-1.55)         | 0.751                  | 0.80(0.47-1.35)         | 0.400                  | 0.69(0.38-1.28)         | 0.240           | 0.74(0.46-1.19)         | 0.209             |
| ECG-LVH                   | <b>2.03(1.41-2.92)#</b> | <b>&lt;0.0001</b>       | <b>1.71(1.18-2.48)#</b> | <b>0.004</b>            | <b>1.52(1.04-2.22)</b> | <b>0.030</b>            | <b>1.55(1.00-2.41)</b> | <b>0.048</b>            | 1.22(0.85-1.76) | 0.279                   |                   |
| Thrombotic stroke (n=819) | Peak QRS-T angle        | <b>1.16(1.08-1.23)#</b> | <b>&lt;0.0001</b>       | 1.04(0.97-1.11)#        | 0.278                  | 1.04(0.97-1.11)#        | 0.272                  | 1.00(0.93-1.08)         | 0.925           | 1.04(0.97-1.11)#        | 0.272             |
|                           | Area QRS-T angle        | <b>1.16(1.09-1.25)#</b> | <b>&lt;0.0001</b>       | <b>1.08(1.00-1.15)#</b> | <b>0.041</b>           | <b>1.08(1.00-1.16)</b>  | <b>0.043</b>           | 1.04(0.96-1.12)         | 0.359           | 1.00(0.93-1.07)#        | 0.958             |
|                           | Peak SVG elevation      | 0.99(0.94-1.07)#        | 0.866                   | 0.95(0.88-1.02)         | 0.189                  | 0.97(0.90-1.04)         | 0.392                  | 0.94(0.87-1.01)         | 0.101           | 0.96(0.89-1.04)         | 0.310             |
|                           | Area SVG elevation      | 1.02(0.95-1.09)#        | 0.608                   | 0.98(0.91-1.05)         | 0.514                  | 0.99(0.92-1.06)         | 0.814                  | 0.97(0.90-1.04)         | 0.396           | 0.98(0.91-1.05)         | 0.539             |
|                           | Peak SVG azimuth        | 1.01(0.94-1.08)#        | 0.778                   | 0.95(0.88-1.02)#        | 0.127                  | 0.95(0.88-1.02)         | 0.134                  | <b>0.91(0.85-0.99)</b>  | <b>0.018</b>    | 0.94(0.88-1.00)#        | 0.068             |
|                           | Area SVG azimuth        | <b>1.08(1.01-1.16)#</b> | <b>0.034</b>            | 1.03(0.96-1.10)         | 0.385                  | 1.03(0.96-1.10)         | 0.481                  | 1.01(0.94-1.08)         | 0.883           | 0.97(0.91-1.03)         | 0.266             |
|                           | Peak SVG magnitude      | 1.05(0.97-1.12)         | 0.218                   | 1.06(0.98-1.14)         | 0.124                  | 1.06(0.99-1.14)         | 0.096                  | 1.06(0.98-1.14)         | 0.142           | <b>1.12(1.04-1.20)</b>  | <b>0.002</b>      |
|                           | Area SVG magnitude      | 1.03(0.96-1.11)         | 0.349                   | 1.06(0.98-1.14)         | 0.130                  | 1.06(0.99-1.15)         | 0.109                  | 1.05(0.98-1.14)         | 0.175           | <b>1.11(1.03-1.19)</b>  | <b>0.004</b>      |
|                           | SAIQRST                 | <b>1.09(1.02-1.17)</b>  | <b>0.008</b>            | <b>1.08(1.01-1.15)</b>  | <b>0.020</b>           | <b>1.10(1.03-1.18)</b>  | <b>0.004</b>           | 1.05(0.97-1.13)         | 0.240           | <b>1.07(1.00-1.15)</b>  | <b>0.045</b>      |
|                           | Bazett's QTc            | <b>1.16(1.10-1.22)#</b> | <b>&lt;0.0001</b>       | <b>1.09(1.02-1.15)#</b> | <b>0.006</b>           | <b>1.09(1.03-1.16)#</b> | <b>0.005</b>           | 1.06(0.99-1.14)#        | 0.087           | <b>1.08(1.01-1.15)</b>  | <b>0.030</b>      |
|                           | QRS duration            | <b>1.10(1.03-1.17)</b>  | <b>0.004</b>            | <b>1.08(1.01-1.15)</b>  | <b>0.022</b>           | <b>1.11(1.03-1.18)</b>  | <b>0.003</b>           | 1.06(0.97-1.16)         | 0.212           | 1.00(0.91-1.10)         | 0.995             |
|                           | PVC                     | <b>1.56(1.03-2.37)</b>  | <b>0.034</b>            | <b>1.48(0.98-2.25)</b>  | <b>0.065</b>           | <b>1.46(0.96-2.23)</b>  | <b>0.076</b>           | 1.43(0.94-2.19)         | 0.093           | 0.86(0.58-1.28)         | 0.468             |
|                           | TD-IBBB                 | 0.98(0.47-2.07)         | 0.960                   | 0.92(0.44-1.94)         | 0.828                  | 0.93(0.44-1.97)         | 0.859                  | 0.95(0.45-2.00)         | 0.891           | 0.62(0.15-2.50)         | 0.500             |
|                           | BBB/IVCD                | 1.15(0.84-1.58)         | 0.368                   | 1.12(0.82-1.54)         | 0.466                  | 1.19(0.87-1.62)         | 0.286                  | 0.87(0.60-1.28)         | 0.487           | 0.79(0.57-1.11)         | 0.173             |
| ECG-LVH                   | <b>1.65(1.30-2.09)#</b> | <b>&lt;0.0001</b>       | <b>1.39(1.09-1.77)</b>  | <b>0.008</b>            | <b>1.43(1.12-1.83)</b> | <b>0.004</b>            | 1.24(0.93-1.65)        | 0.138                   | 1.13(0.89-1.44) | 0.303                   |                   |

SVG=spatial ventricular gradient; SAIQRST=sum absolute QRST integral; LVH-left ventricular hypertrophy; BBB=bundle branch block; IVCD=interventricular conduction delay; PVC=premature ventricular complex.

**Supplemental Table 3. Association of ECG-ventricular substrate with competing other-than-stroke death in cause-specific Cox models.**

| Predictor, per 1 SD           | Model 1                |                              | Model 2                |                        | Model 3                 |                             | Model 4                |                             | Model 5                |                         |                   |
|-------------------------------|------------------------|------------------------------|------------------------|------------------------|-------------------------|-----------------------------|------------------------|-----------------------------|------------------------|-------------------------|-------------------|
|                               | HR(95%CI)              | P-value                      | HR(95%CI)              | P-value                | HR(95%CI)               | P-value                     | HR(95%CI)              | P-value                     | HR(95%CI)              | P-value                 |                   |
| Other-than-ES death (n=4,877) | Peak QRS-T angle       | <b>1.26(1.23-1.29)</b>       | <b>&lt;0.0001</b>      | <b>1.15(1.12-1.18)</b> | <b>&lt;0.0001</b>       | <b>1.13(1.10-1.16)</b>      | <b>&lt;0.0001</b>      | <b>1.11(1.08-1.14)</b>      | <b>&lt;0.0001</b>      | <b>1.12(1.08-1.15)</b>  | <b>&lt;0.0001</b> |
|                               | Area QRS-T angle       | <b>1.23(1.20-1.27)</b>       | <b>&lt;0.0001</b>      | <b>1.15(1.12-1.19)</b> | <b>&lt;0.0001</b>       | <b>1.13(1.10-1.16)</b>      | <b>&lt;0.0001</b>      | <b>1.11(1.08-1.14)</b>      | <b>&lt;0.0001</b>      | <b>1.04(1.01-1.07)</b>  | <b>0.012</b>      |
|                               | Peak SVG elevation     | <b>1.03(0.996-1.06)&amp;</b> | <b>0.091</b>           | 1.01(0.98-1.04)        | 0.424                   | 1.02(0.99-1.05)             | 0.118                  | 1.00(0.97-1.03)             | 0.847                  | <b>0.90(0.88-0.93)</b>  | <b>&lt;0.0001</b> |
|                               | Area SVG elevation     | <b>1.04(1.01-1.07)</b>       | <b>0.004</b>           | 1.02(0.99-1.05)        | 0.169                   | 1.03(0.99-1.06)             | 0.051                  | 1.01(0.98-1.04)             | 0.654                  | <b>0.95(0.92-0.98)</b>  | <b>0.001</b>      |
|                               | Peak SVG azimuth       | <b>1.15(1.12-1.17)</b>       | <b>&lt;0.0001</b>      | <b>1.08(1.05-1.11)</b> | <b>&lt;0.0001</b>       | <b>1.06(1.04-1.09)</b>      | <b>&lt;0.0001</b>      | <b>1.05(1.02-1.07)</b>      | <b>0.001</b>           | <b>1.07(1.04-1.10)</b>  | <b>&lt;0.0001</b> |
|                               | Area SVG azimuth       | <b>1.14(1.11-1.17)</b>       | <b>&lt;0.0001</b>      | <b>1.08(1.05-1.11)</b> | <b>&lt;0.0001</b>       | <b>1.06(1.03-1.09)</b>      | <b>&lt;0.0001</b>      | <b>1.04(1.02-1.07)</b>      | <b>0.003</b>           | <b>1.10(1.07-1.13)</b>  | <b>&lt;0.0001</b> |
|                               | Peak SVG magnitude     | <b>0.91(0.89-0.94)&amp;</b>  | <b>&lt;0.0001</b>      | <b>0.95(0.92-0.98)</b> | <b>&lt;0.0001</b>       | <b>0.96(0.94-0.99)&amp;</b> | <b>0.020</b>           | <b>0.95(0.95-0.99)&amp;</b> | <b>0.008</b>           | 1.01(0.98-1.04)         | 0.448             |
|                               | Area SVG magnitude     | <b>0.96(0.93-0.98)</b>       | <b>0.003</b>           | 0.99(0.96-1.02)        | 0.406                   | 1.005(0.97-1.04)            | 0.767                  | 1.00(0.97-1.03)             | 0.969                  | <b>1.08(1.04-1.11)</b>  | <b>&lt;0.0001</b> |
|                               | SAIQRST                | <b>1.07(1.04-1.10)</b>       | <b>&lt;0.0001</b>      | <b>1.07(1.04-1.10)</b> | <b>&lt;0.0001</b>       | <b>1.09(1.06-1.13)</b>      | <b>&lt;0.0001</b>      | <b>1.06(1.02-1.09)&amp;</b> | <b>0.001</b>           | <b>1.09(1.06-1.12)</b>  | <b>&lt;0.0001</b> |
|                               | Bazett's QTc           | <b>1.17(1.14-1.19)</b>       | <b>&lt;0.0001</b>      | <b>1.09(1.07-1.12)</b> | <b>&lt;0.0001</b>       | <b>1.08(1.05-1.10)</b>      | <b>&lt;0.0001</b>      | <b>1.05(1.03-1.09)</b>      | <b>&lt;0.0001</b>      | <b>0.96(0.93-0.99)</b>  | <b>0.012</b>      |
|                               | QRS duration           | <b>1.07(1.04-1.10)</b>       | <b>&lt;0.0001</b>      | <b>1.05(1.03-1.08)</b> | <b>&lt;0.0001</b>       | <b>1.07(1.04-1.10)</b>      | <b>&lt;0.0001</b>      | 1.00(0.97-1.04)             | 0.949                  | <b>1.07(1.03-1.12)</b>  | <b>0.001</b>      |
|                               | PVC                    | <b>1.60(1.36-1.89)</b>       | <b>&lt;0.0001</b>      | <b>1.50(1.27-1.78)</b> | <b>&lt;0.0001</b>       | <b>1.42(1.20-1.68)</b>      | <b>&lt;0.0001</b>      | <b>1.38(1.17-1.64)</b>      | <b>&lt;0.0001</b>      | 0.97(0.83-1.14)         | 0.743             |
|                               | TD-IBBB                | 0.92(0.68-1.26)              | 0.618                  | 0.90(0.66-1.23)        | 0.510                   | 0.89(0.65-1.22)             | 0.467                  | 0.90(0.66-1.23)             | 0.507                  | <b>0.45(0.21-0.95)</b>  | <b>0.036</b>      |
| BBB/IVCD                      | <b>1.23(1.09-1.39)</b> | <b>0.001</b>                 | <b>1.16(1.03-1.31)</b> | <b>0.014</b>           | <b>1.18(1.05-1.33)</b>  | <b>0.008</b>                | 0.98(0.84-1.13)        | 0.760                       | <b>0.82(0.71-0.94)</b> | <b>0.005</b>            |                   |
| ECG-LVH                       | <b>1.51(1.36-1.68)</b> | <b>&lt;0.0001</b>            | <b>1.39(1.25-1.55)</b> | <b>&lt;0.0001</b>      | <b>1.38(1.24-1.54)</b>  | <b>&lt;0.0001</b>           | <b>1.22(1.08-1.38)</b> | <b>0.001</b>                | 1.06(0.95-1.18)        | 0.277                   |                   |
| Other-than TS-death (n=4,637) | Peak QRS-T angle       | <b>1.26(1.22-1.29)</b>       | <b>&lt;0.0001</b>      | <b>1.15(1.12-1.18)</b> | <b>&lt;0.0001</b>       | <b>1.12(1.10-1.16)</b>      | <b>&lt;0.0001</b>      | <b>1.11(1.08-1.14)</b>      | <b>&lt;0.0001</b>      | <b>1.12(1.09-1.15)</b>  | <b>&lt;0.0001</b> |
|                               | Area QRS-T angle       | <b>1.23(1.19-1.26)</b>       | <b>&lt;0.0001</b>      | <b>1.15(1.12-1.18)</b> | <b>&lt;0.0001</b>       | <b>1.13(1.09-1.16)</b>      | <b>&lt;0.0001</b>      | <b>1.11(1.07-1.14)</b>      | <b>&lt;0.0001</b>      | <b>1.05(1.01-1.08)</b>  | <b>0.005</b>      |
|                               | Peak SVG elevation     | 1.02(0.99-1.05)              | 0.170                  | 1.01(0.98-1.04)        | 0.592                   | 1.02(0.99-1.05)             | 0.227                  | 0.99(0.96-1.03)             | 0.733                  | <b>0.91(0.88-0.94)</b>  | <b>&lt;0.0001</b> |
|                               | Area SVG elevation     | 1.03(1.01-1.07)              | 0.015                  | 1.02(0.99-1.04)        | 0.295                   | 1.02(0.996-1.05)            | 0.097                  | 1.01(0.98-1.04)             | 0.707                  | <b>0.95(0.92-0.98)</b>  | <b>0.001</b>      |
|                               | Peak SVG azimuth       | <b>1.15(1.12-1.18)</b>       | <b>&lt;0.0001</b>      | <b>1.08(1.05-1.11)</b> | <b>&lt;0.0001</b>       | <b>1.07(1.04-1.10)</b>      | <b>&lt;0.0001</b>      | <b>1.05(1.02-1.08)</b>      | <b>&lt;0.0001</b>      | <b>1.07(1.05-1.10)</b>  | <b>&lt;0.0001</b> |
|                               | Area SVG azimuth       | <b>1.15(1.11-1.18)</b>       | <b>&lt;0.0001</b>      | <b>1.09(1.06-1.12)</b> | <b>&lt;0.0001</b>       | <b>1.08(1.04-1.10)</b>      | <b>&lt;0.0001</b>      | <b>1.05(1.02-1.08)</b>      | <b>0.001</b>           | <b>1.11(1.07-1.14)</b>  | <b>&lt;0.0001</b> |
|                               | Peak SVG magnitude     | <b>0.91(0.88-0.94)</b>       | <b>&lt;0.0001</b>      | <b>0.95(0.92-0.98)</b> | <b>&lt;0.0001</b>       | <b>0.96(0.93-0.99)</b>      | <b>0.021</b>           | <b>0.96(0.93-0.99)</b>      | <b>0.008</b>           | 1.01(0.98-1.05)         | 0.388             |
|                               | Area SVG magnitude     | <b>0.96(0.93-0.99)</b>       | <b>0.004</b>           | 0.99(0.96-1.02)        | 0.461                   | 1.01(0.97-1.04)             | 0.696                  | 1.00(0.97-1.03)             | 0.934                  | <b>1.09(1.05-1.12)</b>  | <b>&lt;0.0001</b> |
|                               | SAIQRST                | <b>1.07(1.04-1.10)</b>       | <b>&lt;0.0001</b>      | <b>1.07(1.04-1.11)</b> | <b>&lt;0.0001</b>       | <b>1.10(1.06-1.13)</b>      | <b>&lt;0.0001</b>      | <b>1.07(1.03-1.10)</b>      | <b>&lt;0.0001</b>      | <b>1.10(1.06-1.13)</b>  | <b>&lt;0.0001</b> |
|                               | Bazett's QTc           | <b>1.16(1.14-1.19)</b>       | <b>&lt;0.0001</b>      | <b>1.09(1.06-1.12)</b> | <b>&lt;0.0001</b>       | <b>1.07(1.04-1.10)</b>      | <b>&lt;0.0001</b>      | <b>1.05(1.02-1.08)</b>      | <b>&lt;0.0001</b>      | <b>0.97(0.93-0.997)</b> | <b>0.043</b>      |
|                               | QRS duration           | <b>1.07(1.04-1.10)</b>       | <b>&lt;0.0001</b>      | <b>1.05(1.02-1.08)</b> | <b>&lt;0.0001</b>       | <b>1.06(1.03-1.09)</b>      | <b>&lt;0.0001</b>      | 0.99(0.96-1.04)             | 0.878                  | <b>1.09(1.05-1.14)</b>  | <b>&lt;0.0001</b> |
|                               | PVC                    | <b>1.56(1.31-1.85)</b>       | <b>&lt;0.0001</b>      | <b>1.45(1.22-1.72)</b> | <b>&lt;0.0001</b>       | <b>1.36(1.14-1.62)</b>      | <b>0.001</b>           | <b>1.33(1.11-1.59)</b>      | <b>0.002</b>           | 1.00(0.85-1.17)         | 0.981             |
|                               | TD-IBBB                | 0.92(0.67-1.27)              | 0.617                  | 0.89(0.65-1.23)        | 0.493                   | 0.89(0.64-1.22)             | 0.459                  | 0.89(0.65-1.23)             | 0.486                  | 0.57(0.29-1.11)         | 0.099             |
| BBB/IVCD                      | <b>1.22(1.07-1.38)</b> | <b>0.002</b>                 | <b>1.15(1.02-1.31)</b> | <b>0.025</b>           | <b>1.15(1.02-1.31)</b>  | <b>0.025</b>                | 0.96(0.82-1.12)        | 0.595                       | <b>0.68(0.58-0.79)</b> | <b>&lt;0.0001</b>       |                   |
| ECG-LVH                       | <b>1.50(1.35-1.67)</b> | <b>&lt;0.0001</b>            | <b>1.37(1.23-1.52)</b> | <b>&lt;0.0001</b>      | <b>1.36(1.22-1.52)</b>  | <b>&lt;0.0001</b>           | <b>1.19(1.05-1.36)</b> | <b>0.006</b>                | 1.11(0.996-1.24)       | 0.058                   |                   |
| Other-than ICH-death (n=496)  | Peak QRS-T angle       | <b>1.27(1.24-1.30)</b>       | <b>&lt;0.0001</b>      | <b>1.15(1.12-1.18)</b> | <b>&lt;0.0001</b>       | <b>1.13(1.10-1.16)</b>      | <b>&lt;0.0001</b>      | <b>1.11(1.08-1.14)</b>      | <b>&lt;0.0001</b>      | <b>1.17(1.14-1.20)</b>  | <b>&lt;0.0001</b> |
|                               | Area QRS-T angle       | <b>1.24(1.21-1.27)</b>       | <b>&lt;0.0001</b>      | <b>1.16(1.13-1.19)</b> | <b>&lt;0.0001</b>       | <b>1.13(1.10-1.16)</b>      | <b>&lt;0.0001</b>      | <b>1.11(1.08-1.15)</b>      | <b>&lt;0.0001</b>      | <b>1.10(1.07-1.13)</b>  | <b>&lt;0.0001</b> |
|                               | Peak SVG elevation     | 1.03(0.997-1.06)             | 0.076                  | 1.01(0.98-1.04)        | 0.414                   | 1.02(0.99-1.05)             | 0.139                  | 0.995(0.97-1.03)            | 0.742                  | <b>0.86(0.83-0.89)</b>  | <b>&lt;0.0001</b> |
|                               | Area SVG elevation     | <b>1.04(1.01-1.07)</b>       | <b>0.003</b>           | 1.02(0.99-1.05)        | 0.145                   | 1.03(0.999-1.06)            | 0.051                  | 1.01(0.98-1.03)             | 0.680                  | <b>0.93(0.90-0.95)</b>  | <b>&lt;0.0001</b> |
|                               | Peak SVG azimuth       | <b>1.15(1.12-1.18)</b>       | <b>&lt;0.0001</b>      | <b>1.08(1.05-1.11)</b> | <b>&lt;0.0001</b>       | <b>1.06(1.04-1.09)</b>      | <b>&lt;0.0001</b>      | <b>1.05(1.02-1.07)</b>      | <b>0.001</b>           | <b>1.11(1.08-1.14)</b>  | <b>&lt;0.0001</b> |
|                               | Area SVG azimuth       | <b>1.14(1.11-1.17)</b>       | <b>&lt;0.0001</b>      | <b>1.08(1.05-1.11)</b> | <b>&lt;0.0001</b>       | <b>1.06(1.03-1.09)</b>      | <b>&lt;0.0001</b>      | <b>1.04(1.01-1.07)</b>      | <b>0.004</b>           | <b>1.15(1.12-1.18)</b>  | <b>&lt;0.0001</b> |
| Peak SVG magnitude            | <b>0.92(0.89-0.94)</b> | <b>&lt;0.0001</b>            | <b>0.95(0.92-0.98)</b> | <b>0.001</b>           | <b>0.97(0.94-0.998)</b> | <b>0.037</b>                | <b>0.96(0.93-0.99)</b> | <b>0.015</b>                | 0.98(0.95-1.01)        | 0.171                   |                   |

|                    |                        |                   |                        |                   |                        |                   |                        |                   |                        |                   |
|--------------------|------------------------|-------------------|------------------------|-------------------|------------------------|-------------------|------------------------|-------------------|------------------------|-------------------|
| Area SVG magnitude | <b>0.96(0.93-0.99)</b> | <b>0.004</b>      | 0.99(0.96-1.02)        | 0.574             | 1.01(0.98-1.04)        | 0.569             | 1.00(0.97-1.04)        | 0.805             | <b>1.07(1.04-1.10)</b> | <b>&lt;0.0001</b> |
| SAIQRST            | <b>1.07(1.04-1.10)</b> | <b>&lt;0.0001</b> | <b>1.08(1.05-1.11)</b> | <b>&lt;0.0001</b> | <b>1.10(1.07-1.13)</b> | <b>&lt;0.0001</b> | <b>1.07(1.03-1.10)</b> | <b>&lt;0.0001</b> | <b>1.10(1.07-1.13)</b> | <b>&lt;0.0001</b> |
| Bazett's QTc       | <b>1.17(1.15-1.20)</b> | <b>&lt;0.0001</b> | <b>1.10(1.07-1.12)</b> | <b>&lt;0.0001</b> | <b>1.08(1.05-1.10)</b> | <b>&lt;0.0001</b> | <b>1.06(1.03-1.09)</b> | <b>&lt;0.0001</b> | 0.99(0.96-1.02)        | 0.551             |
| QRS duration       | <b>1.07(1.04-1.10)</b> | <b>&lt;0.0001</b> | <b>1.06(1.03-1.08)</b> | <b>&lt;0.0001</b> | <b>1.07(1.04-1.10)</b> | <b>&lt;0.0001</b> | 0.998(0.96-1.03)       | 0.916             | <b>1.06(1.02-1.11)</b> | <b>0.005</b>      |
| PVC                | <b>1.58(1.34-1.87)</b> | <b>&lt;0.0001</b> | <b>1.49(1.26-1.76)</b> | <b>&lt;0.0001</b> | <b>1.41(1.19-1.66)</b> | <b>&lt;0.0001</b> | <b>1.36(1.15-1.61)</b> | <b>0.001</b>      | 0.98(0.84-1.14)        | 0.769             |
| TD-IBBB            | <b>0.83(0.60-1.15)</b> | 0.267             | <b>0.81(0.59-1.12)</b> | 0.203             | <b>0.80(0.58-1.10)</b> | 0.171             | <b>0.81(0.58-1.12)</b> | 0.193             | <b>0.62(0.31-1.24)</b> | <b>0.175</b>      |
| BBB/IVCD           | <b>1.24(1.10-1.40)</b> | <b>&lt;0.0001</b> | <b>1.18(1.04-1.33)</b> | <b>0.008</b>      | <b>1.18(1.05-1.33)</b> | <b>0.007</b>      | 0.98(0.85-1.13)        | 0.783             | <b>0.76(0.66-0.87)</b> | <b>&lt;0.0001</b> |
| ECG-LVH            | <b>1.53(1.38-1.69)</b> | <b>&lt;0.0001</b> | <b>1.40(1.27-1.55)</b> | <b>&lt;0.0001</b> | <b>1.38(1.25-1.54)</b> | <b>&lt;0.0001</b> | <b>1.22(1.08-1.38)</b> | <b>0.001</b>      | <b>1.16(1.04-1.29)</b> | <b>0.006</b>      |

Orange-shade box = statistically significant ( $P < 0.05$ ) difference in the strength of the association between two competing outcomes (incident stroke versus other-than-stroke death). ICH= definite intracerebral hemorrhage; TS=thrombotic stroke; ES=embolic stroke.

**Supplemental Table 4. Heterogeneity by sex and age in the association of ECG-ventricular substrate with incident stroke in cause-specific, fully adjusted time-updated Cox model #5.**

| Predictor, per 1 SD        | Men                |                        | Women        |                        | <i>P</i> -sex interaction | <i>P</i> -age interaction |              |
|----------------------------|--------------------|------------------------|--------------|------------------------|---------------------------|---------------------------|--------------|
|                            | HR(95%CI)          | <i>P</i> -value        | HR(95%CI)    | <i>P</i> -value        |                           |                           |              |
| Embolic stroke (n=335)     | Peak QRS-T angle   | 1.14(1.00-1.30)        | 0.048        | 1.12(0.98-1.28)        | 0.099                     | 0.821                     | 0.831        |
|                            | Area QRS-T angle   | 1.21(1.05-1.41)        | 0.009        | 1.10(0.95-1.26)        | 0.174                     | 0.425                     | 0.829        |
|                            | Peak SVG elevation | 1.08(0.94-1.24)        | 0.288        | 0.99(0.85-1.16)        | 0.918                     | 0.397                     | 0.965        |
|                            | Area SVG elevation | 1.01(0.88-1.16)        | 0.890        | 1.01(0.87-1.17)        | 0.905                     | 0.889                     | 0.901        |
|                            | Peak SVG azimuth   | 1.06(0.95-1.19)        | 0.280        | 0.96(0.82-1.13)        | 0.611                     | 0.322                     | 0.643        |
|                            | Area SVG azimuth   | 1.03(0.92-1.16)        | 0.568        | 1.02(0.89-1.17)        | 0.793                     | 0.867                     | 0.135        |
|                            | Peak SVG magnitude | 1.21(1.04-1.41)        | 0.012        | 1.05(0.92-1.22)        | 0.460                     | 0.245                     | 0.158        |
|                            | Area SVG magnitude | 1.30(1.12-1.50)        | <0.0001      | 1.08(0.93-1.25)        | 0.296                     | 0.177                     | 0.159        |
|                            | SAIQRST            | 1.13(1.01-1.27)        | 0.030        | 1.18(1.01-1.38)        | 0.038                     | 0.738                     | 0.675        |
|                            | Bazett's QTc       | 1.04(0.92-1.18)        | 0.535        | 0.95(0.82-1.09)        | 0.447                     | 0.730                     | 0.921        |
|                            | QRS duration       | 0.87(0.73-1.05)        | 0.140        | 0.99(0.81-1.22)        | 0.954                     | 0.477                     | 0.157        |
|                            | PVC                | <b>0.86(0.46-1.66)</b> | <b>0.631</b> | <b>2.08(1.16-3.73)</b> | <b>0.013</b>              | <b>0.051</b>              | 0.113        |
|                            | TD-IBBB            | 2.17(0.30-15.77)       | 0.445        | 1.87(0.25-13.76)       | 0.538                     | 0.946                     | 0.521        |
|                            | BBB/IVCD           | 1.00(0.57-1.76)        | 0.995        | 0.72(0.36-1.43)        | 0.350                     | 0.610                     | 0.625        |
|                            | ECG-LVH            | 1.65(1.01-2.69)        | 0.043        | 1.11(0.71-1.76)        | 0.632                     | 0.565                     | 0.120        |
| Thrombotic stroke (n=819)  | Peak QRS-T angle   | 1.07(0.98-1.17)        | 0.127        | 1.04(0.94-1.14)        | 0.469                     | 0.771                     | 0.605        |
|                            | Area QRS-T angle   | 1.02(0.93-1.13)        | 0.626        | 1.00(0.90-1.11)        | 0.995                     | 0.916                     | 0.793        |
|                            | Peak SVG elevation | <b>1.05(0.96-1.15)</b> | <b>0.295</b> | <b>0.88(0.79-0.99)</b> | <b>0.026</b>              | <b>0.038</b>              | 0.825        |
|                            | Area SVG elevation | 1.02(0.93-1.11)        | 0.707        | 0.94(0.84-1.04)        | 0.220                     | 0.278                     | 0.323        |
|                            | Peak SVG azimuth   | 0.97(0.89-1.05)        | 0.426        | 0.92(0.82-1.03)        | 0.150                     | 0.644                     | 0.334        |
|                            | Area SVG azimuth   | 0.97(0.90-1.05)        | 0.418        | 0.99(0.89-1.09)        | 0.784                     | 0.670                     | 0.060        |
|                            | Peak SVG magnitude | 1.12(1.02-1.24)        | 0.017        | 1.12(1.01-1.22)        | 0.031                     | 0.861                     | 0.639        |
|                            | Area SVG magnitude | 1.10(1.01-1.21)        | 0.039        | 1.12(1.01-1.24)        | 0.027                     | 0.802                     | 0.839        |
|                            | SAIQRST            | 1.05(0.97-1.15)        | 0.177        | 1.14(1.02-1.28)        | 0.024                     | 0.128                     | 0.790        |
|                            | Bazett's QTc       | 1.09(0.99-1.20)        | 0.081        | 1.08(0.99-1.18)        | 0.102                     | 0.968                     | 0.861        |
|                            | QRS duration       | 0.98(0.86-1.10)        | 0.693        | 0.98(0.85-1.13)        | 0.822                     | 0.620                     | 0.520        |
|                            | PVC                | 0.90(0.56-1.45)        | 0.671        | 0.78(0.41-1.48)        | 0.477                     | 0.846                     | 0.821        |
|                            | TD-IBBB            | 0.62(0.09-4.44)        | 0.634        | 0.48(0.07-3.58)        | 0.477                     | 0.769                     | 0.415        |
|                            | BBB/IVCD           | 0.89(0.60-1.33)        | 0.576        | 0.81(0.49-1.35)        | 0.422                     | 0.877                     | 0.237        |
|                            | ECG-LVH            | 1.21(0.87-1.68)        | 0.250        | 1.10(0.79-1.52)        | 0.580                     | 0.891                     | 0.895        |
| Hemorrhagic stroke (n=120) | Peak QRS-T angle   | 0.86(0.62-1.18)        | 0.349        | 1.24(0.95-1.61)        | 0.109                     | 0.327                     | <b>0.029</b> |
|                            | Area QRS-T angle   | 0.77(0.55-1.07)        | 0.116        | 1.18(0.89-1.57)        | 0.252                     | 0.206                     | <b>0.026</b> |
|                            | Peak SVG elevation | 0.90(0.67-1.21)        | 0.499        | 0.91(0.78-1.21)        | 0.499                     | 0.493                     | 0.175        |
|                            | Area SVG elevation | 0.98(0.73-1.32)        | 0.889        | 0.96(0.71-1.30)        | 0.788                     | 0.554                     | 0.130        |
|                            | Peak SVG azimuth   | 0.93(0.70-1.23)        | 0.620        | 1.16(0.87-1.54)        | 0.314                     | 0.607                     | <b>0.025</b> |
|                            | Area SVG azimuth   | 0.98(0.71-1.37)        | 0.914        | 1.35(0.97-1.87)        | 0.076                     | 0.456                     | <b>0.042</b> |
|                            | Peak SVG magnitude | 1.26(0.96-1.66)        | 0.089        | 1.16(0.90-1.49)        | 0.262                     | 0.339                     | 0.413        |
|                            | Area SVG magnitude | 1.27(0.99-1.63)        | 0.062        | 1.23(0.95-1.59)        | 0.116                     | 0.909                     | 0.553        |
|                            | SAIQRST            | 1.04(0.76-1.42)        | 0.808        | 1.22(0.85-1.74)        | 0.288                     | 0.837                     | 0.218        |
|                            | Bazett's QTc       | 0.78(0.51-1.20)        | 0.266        | 0.94(0.70-1.27)        | 0.696                     | 0.769                     | 0.468        |
|                            | QRS duration       | 0.97(0.61-1.54)        | 0.902        | 0.78(0.50-1.22)        | 0.282                     | 0.333                     | 0.227        |
|                            | PVC                | 3.2e(-20)              | n/a          | 2.73(0.83-8.93)        | 0.097                     | n/a                       | 0.634        |
|                            | TD-IBBB            | 4.63e(-16)             | 1.00         | 2.06e(-14)             | 1.00                      | n/a                       | 1.00         |
|                            | BBB/IVCD           | 0.57(0.11-2.85)        | 0.494        | 0.79(0.09-6.63)        | 0.829                     | 0.842                     | 0.542        |
|                            | ECG-LVH            | <b>3.06(1.18-7.99)</b> | <b>0.022</b> | <b>0.46(0.10-2.09)</b> | <b>0.315</b>              | <b>0.030</b>              | 0.075        |

**Supplemental Figure 1 A. Representative example of tachycardia-dependent intermittent right bundle branch block on a 12-lead ECG (A) and orthogonal XYZ ECG (B). Normal sinus beats are labeled N. Sinus beats with intermittent bundle branch block beats are labeled I.**

A.

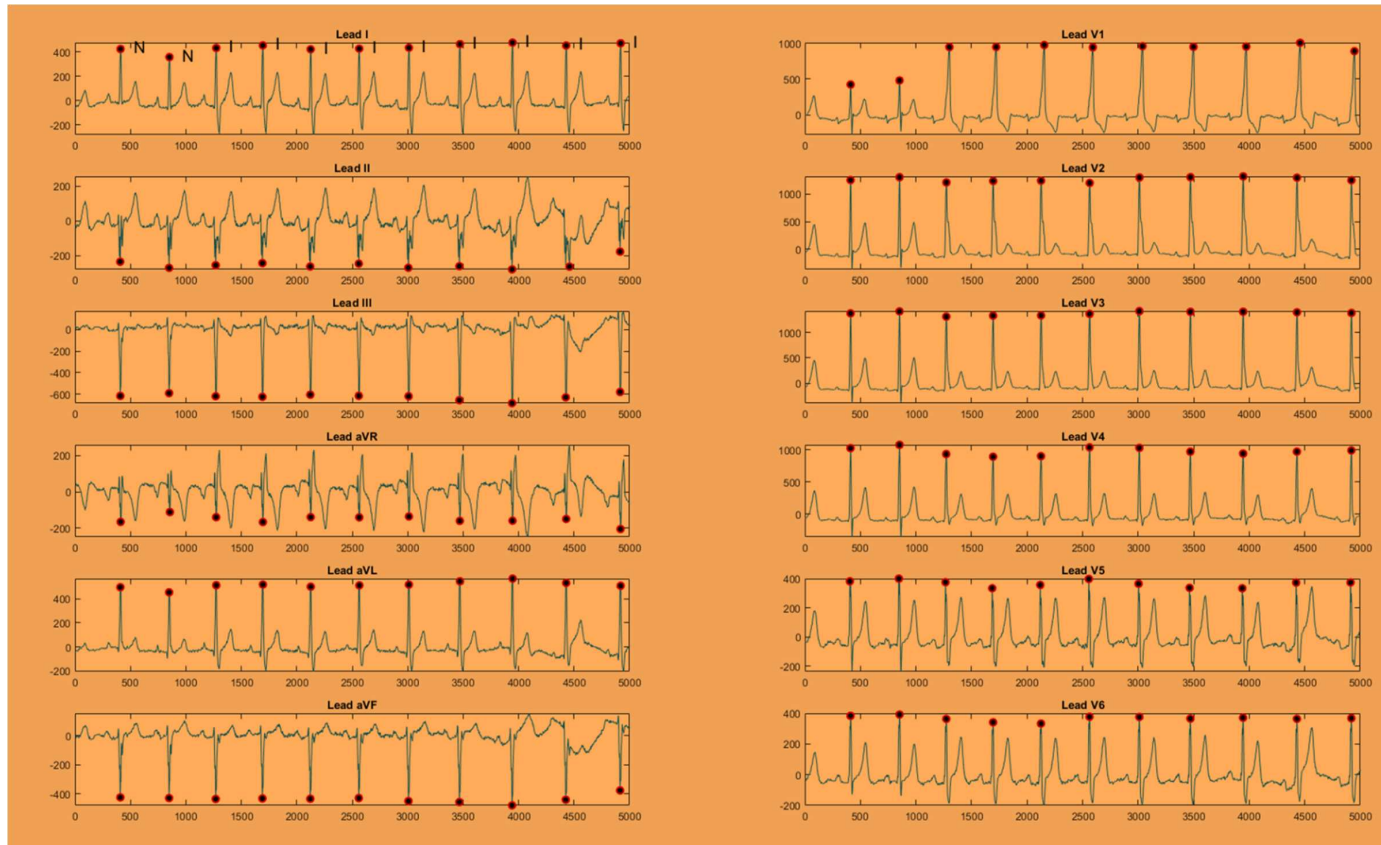

B.

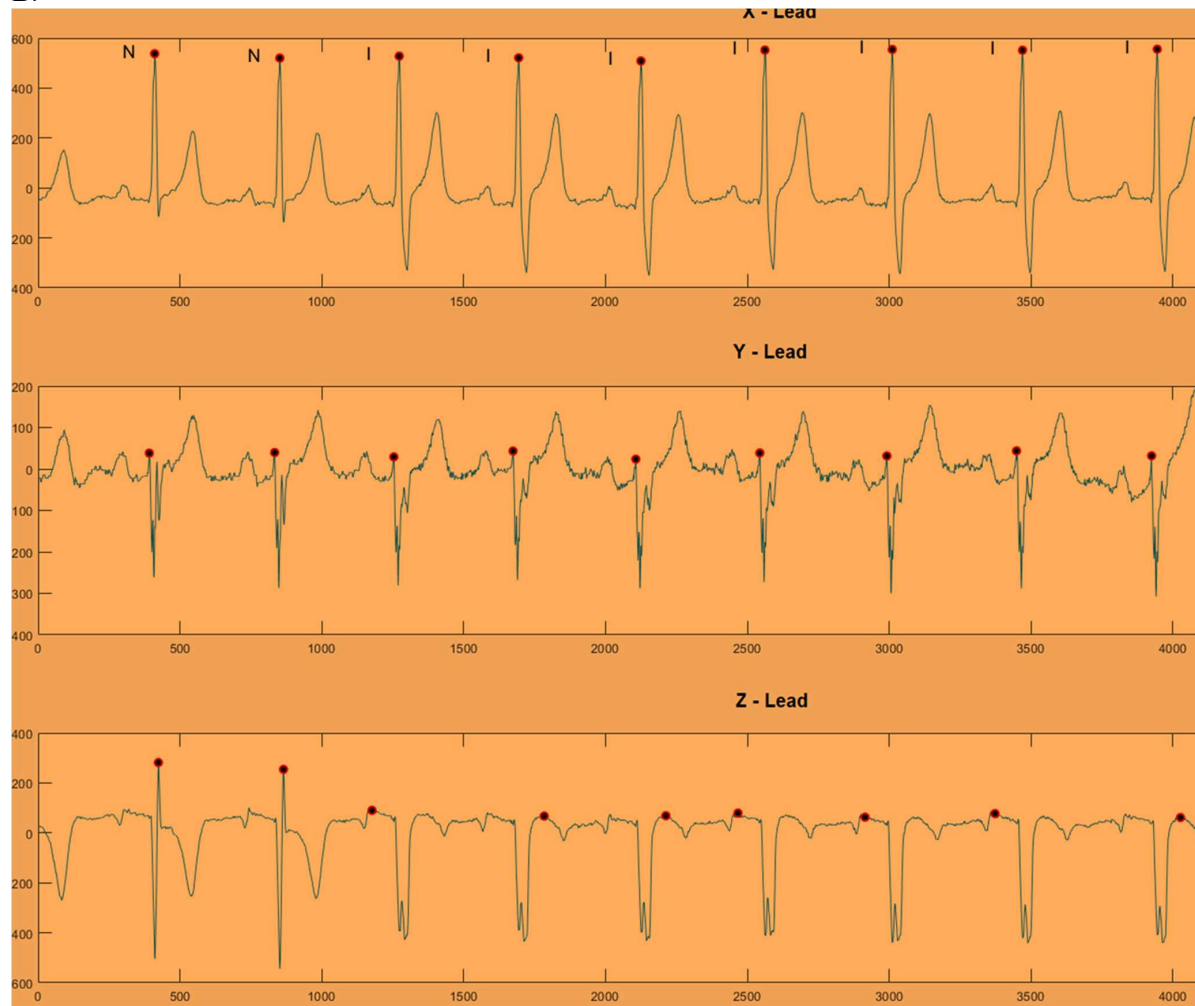



**Supplemental Figure 2. A representative example of an aberrant premature atrial complex on a 12-lead ECG (A) and orthogonal XYZ ECG (B). Normal sinus beats are labeled N. Premature atrial complexes with normal ventricular conduction are labeled A. Premature atrial complex with aberrant ventricular conduction (right bundle branch block) is labeled W.**

A

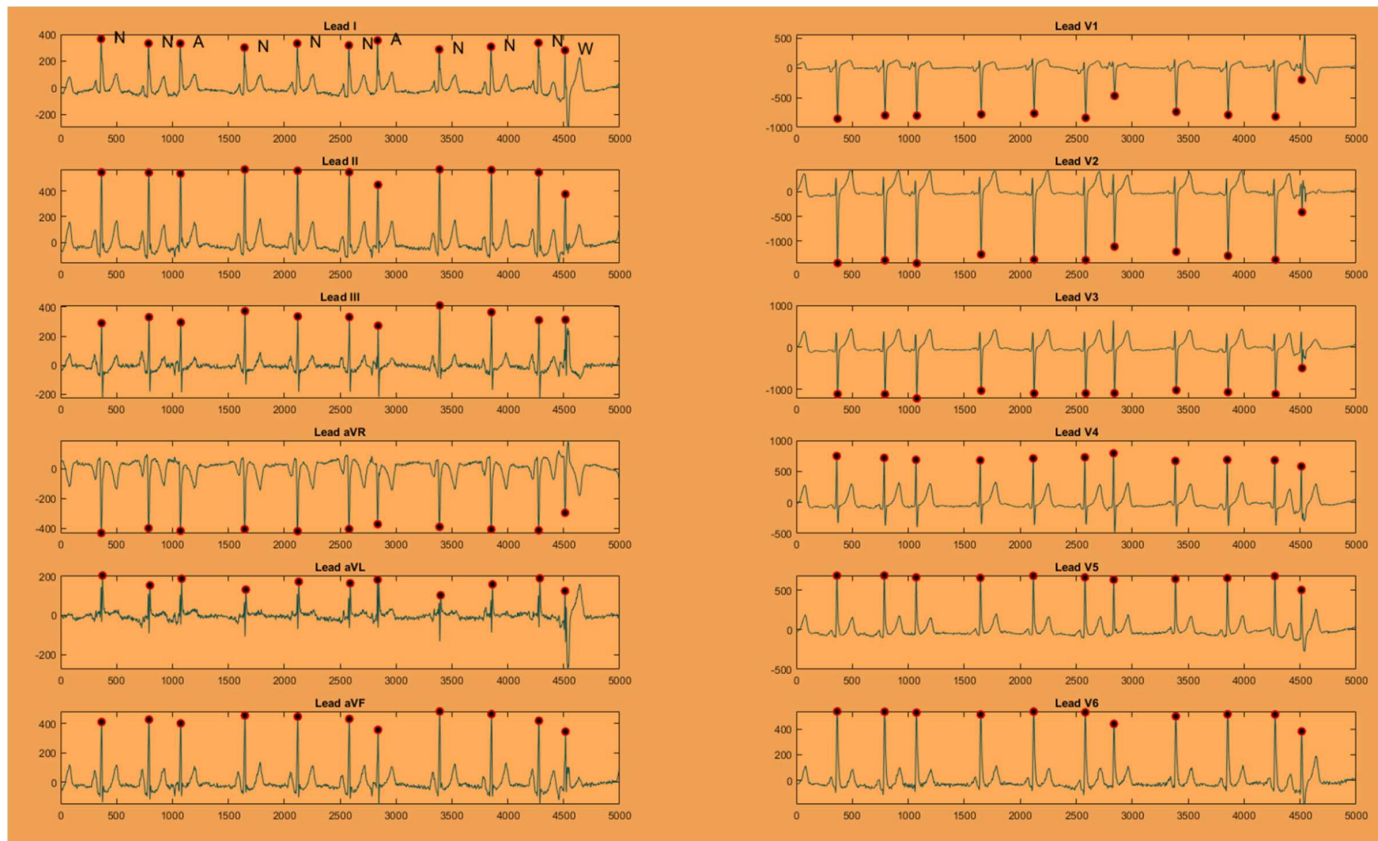

B

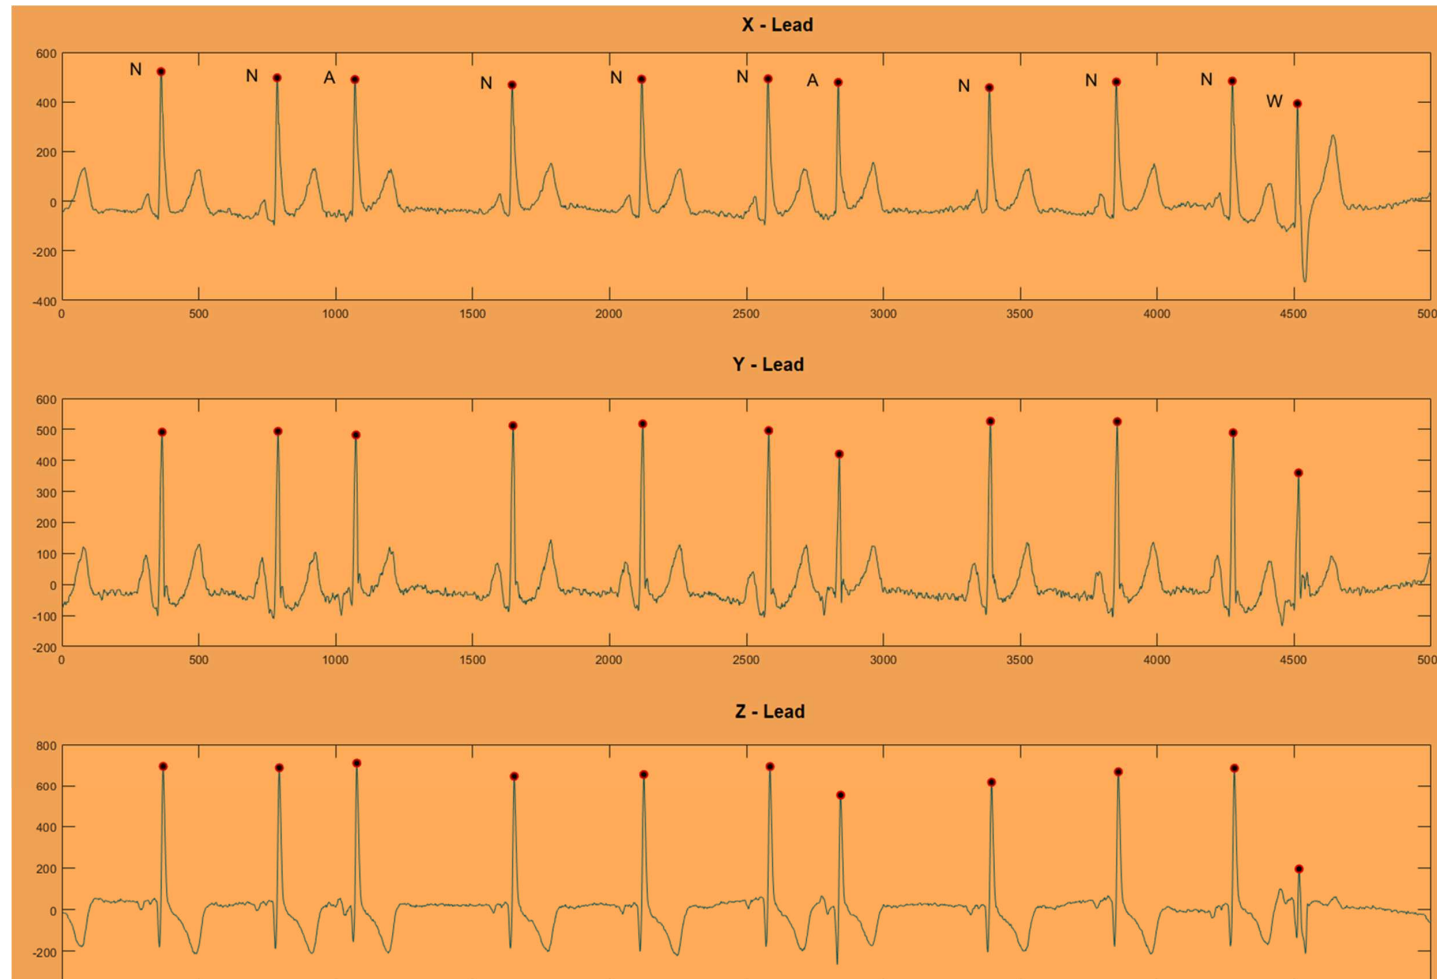

**Supplemental Figure 3. Estimated fully adjusted (model 5) hazard ratio of definite intracerebral hemorrhage in participants across the range of time-updated spatial QRS-T angle and baseline (visit 1) age.**

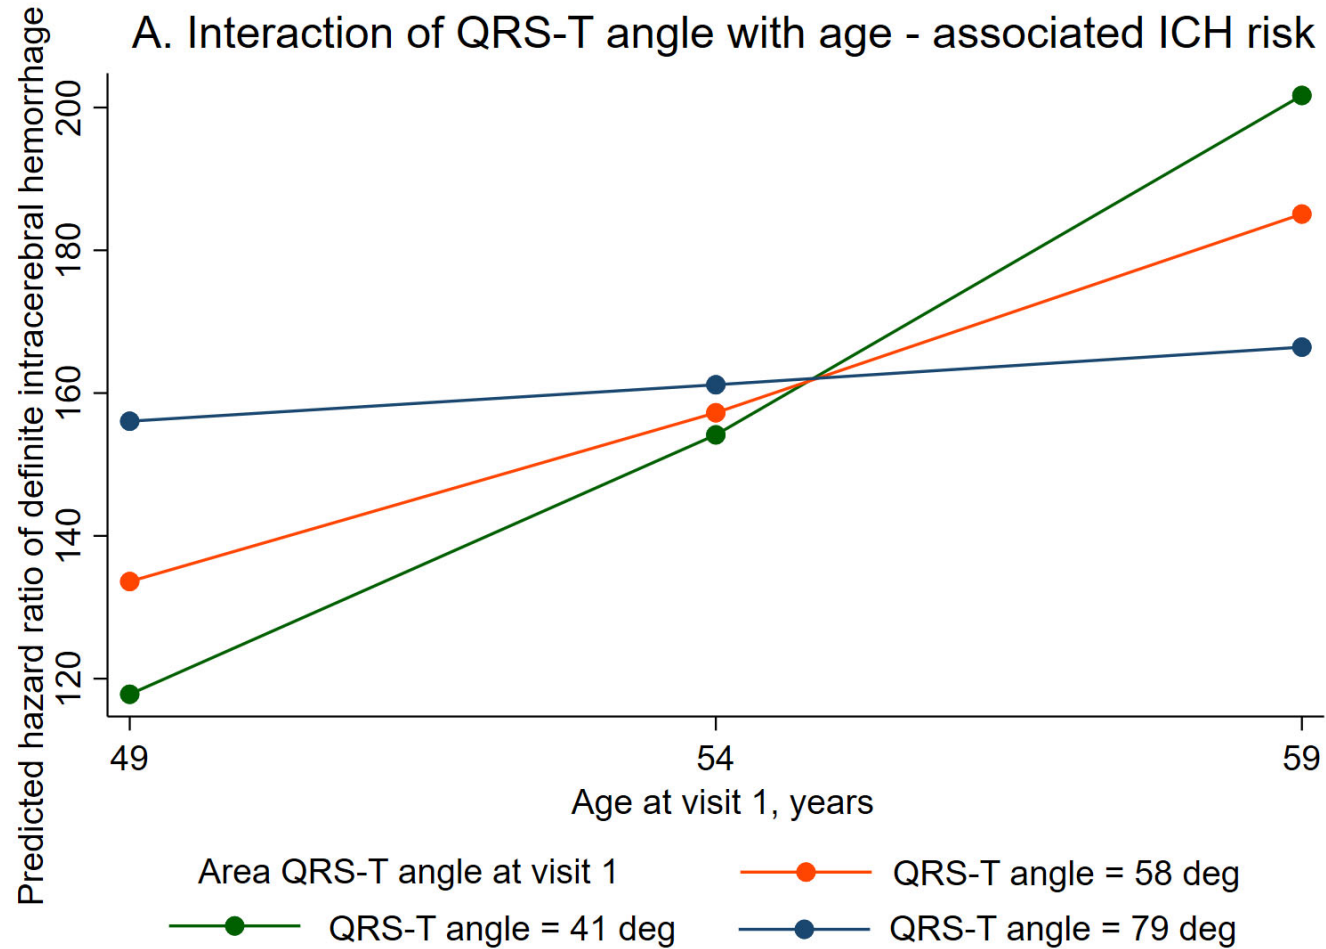

**Supplemental Figure 4. Estimated fully adjusted (model 5) hazard ratio of definite intracerebral hemorrhage in participants across the range of time-updated SVG azimuth and baseline (visit 1) age.**

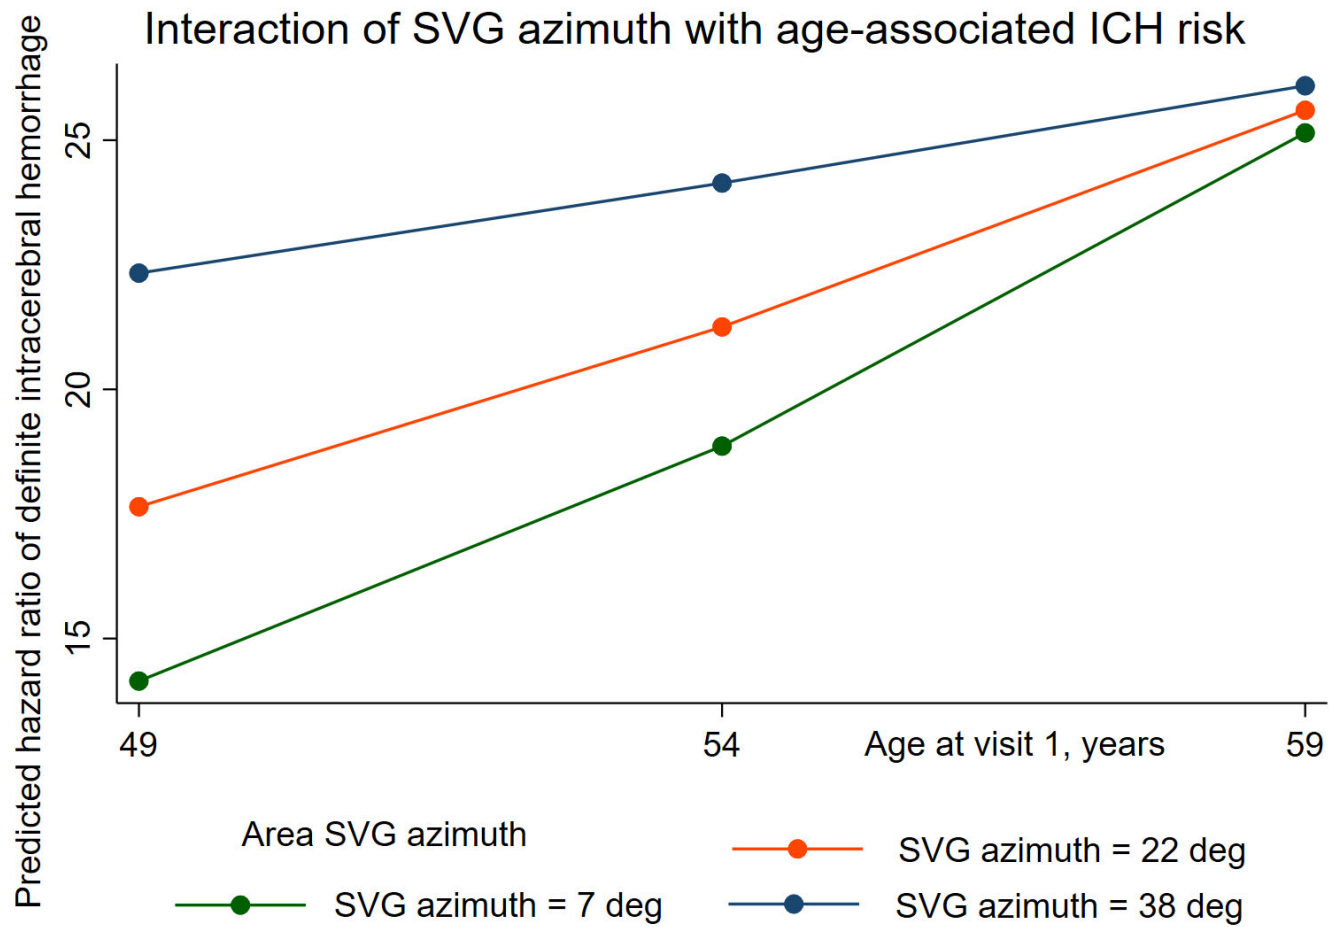

Supplement: bmjopen-2020-048542supp001.pdf [file bmjopen-2020-048542supp001.pdf]
